# Supplementary material for: Global Prevalence and Device Related Causes of Needle Stick Injuries among Health Care Workers: A Systematic Review and Meta-Analysis
Source: PubMed Central journal article supplement (PMC7181946; doi:10.5334/aogh.2698), 2020-04-06
Supplement: agh-86-1-2698-s1.pdf [file agh-86-1-2698-s1.pdf]

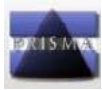

## Supplementary table 1. PRISMA 2009 Checklist

| Section/topic             | #  | Checklist item                                                                                                                                                                                                                                                                                              | Reported on page # |
|---------------------------|----|-------------------------------------------------------------------------------------------------------------------------------------------------------------------------------------------------------------------------------------------------------------------------------------------------------------|--------------------|
| <b>TITLE</b>              |    |                                                                                                                                                                                                                                                                                                             |                    |
| Title                     | 1  | Identify the report as a systematic review, meta-analysis, or both.                                                                                                                                                                                                                                         | 1                  |
| <b>ABSTRACT</b>           |    |                                                                                                                                                                                                                                                                                                             |                    |
| Structured summary        | 2  | Provide a structured summary including, as applicable: background; objectives; data sources; study eligibility criteria, participants, and interventions; study appraisal and synthesis methods; results; limitations; conclusions and implications of key findings; systematic review registration number. | 3                  |
| <b>INTRODUCTION</b>       |    |                                                                                                                                                                                                                                                                                                             |                    |
| Rationale                 | 3  | Describe the rationale for the review in the context of what is already known.                                                                                                                                                                                                                              | 4                  |
| Objectives                | 4  | Provide an explicit statement of questions being addressed with reference to participants, interventions, comparisons, outcomes, and study design (PICOS).                                                                                                                                                  | 5                  |
| <b>METHODS</b>            |    |                                                                                                                                                                                                                                                                                                             |                    |
| Protocol and registration | 5  | Indicate if a review protocol exists, if and where it can be accessed (e.g., Web address), and, if available, provide registration information including registration number.                                                                                                                               | 6                  |
| Eligibility criteria      | 6  | Specify study characteristics (e.g., PICOS, length of follow-up) and report characteristics (e.g., years considered, language, publication status) used as criteria for eligibility, giving rationale.                                                                                                      | 6                  |
| Information sources       | 7  | Describe all information sources (e.g., databases with dates of coverage, contact with study authors to identify additional studies) in the search and date last searched.                                                                                                                                  | 6                  |
| Search                    | 8  | Present full electronic search strategy for at least one database, including any limits used, such that it could be repeated.                                                                                                                                                                               | 6                  |
| Study selection           | 9  | State the process for selecting studies (i.e., screening, eligibility, included in systematic review, and, if applicable, included in the meta-analysis).                                                                                                                                                   | 7                  |
| Data collection process   | 10 | Describe method of data extraction from reports (e.g., piloted forms, independently, in duplicate) and any processes for obtaining and confirming data from investigators.                                                                                                                                  | 7                  |

|                                    |    |                                                                                                                                                                                                                        |   |
|------------------------------------|----|------------------------------------------------------------------------------------------------------------------------------------------------------------------------------------------------------------------------|---|
| Data items                         | 11 | List and define all variables for which data were sought (e.g., PICOS, funding sources) and any assumptions and simplifications made.                                                                                  | 7 |
| Risk of bias in individual studies | 12 | Describe methods used for assessing risk of bias of individual studies (including specification of whether this was done at the study or outcome level), and how this information is to be used in any data synthesis. | 8 |
| Summary measures                   | 13 | State the principal summary measures (e.g., risk ratio, difference in means).                                                                                                                                          | 8 |
| Synthesis of results               | 14 | Describe the methods of handling data and combining results of studies, if done, including measures of consistency (e.g., $I^2$ ) for each meta-analysis.                                                              | 8 |

Page 1 of 2

| Section/topic                 | #  | Checklist item                                                                                                                                                                                           | Reported on page # |
|-------------------------------|----|----------------------------------------------------------------------------------------------------------------------------------------------------------------------------------------------------------|--------------------|
| Risk of bias across studies   | 15 | Specify any assessment of risk of bias that may affect the cumulative evidence (e.g., publication bias, selective reporting within studies).                                                             | -                  |
| Additional analyses           | 16 | Describe methods of additional analyses (e.g., sensitivity or subgroup analyses, meta-regression), if done, indicating which were pre-specified.                                                         |                    |
| <b>RESULTS</b>                |    |                                                                                                                                                                                                          |                    |
| Study selection               | 17 | Give numbers of studies screened, assessed for eligibility, and included in the review, with reasons for exclusions at each stage, ideally with a flow diagram.                                          | 9                  |
| Study characteristics         | 18 | For each study, present characteristics for which data were extracted (e.g., study size, PICOS, follow-up period) and provide the citations.                                                             | 9                  |
| Risk of bias within studies   | 19 | Present data on risk of bias of each study and, if available, any outcome level assessment (see item 12).                                                                                                | 10                 |
| Results of individual studies | 20 | For all outcomes considered (benefits or harms), present, for each study: (a) simple summary data for each intervention group (b) effect estimates and confidence intervals, ideally with a forest plot. | 11-13              |
| Synthesis of results          | 21 | Present results of each meta-analysis done, including confidence intervals and measures of consistency.                                                                                                  | 11-13              |
| Risk of bias across studies   | 22 | Present results of any assessment of risk of bias across studies (see Item 15).                                                                                                                          | 11-13              |
| Additional analysis           | 23 | Give results of additional analyses, if done (e.g., sensitivity or subgroup analyses, meta-regression [see Item 16]).                                                                                    | 11-13              |
| <b>DISCUSSION</b>             |    |                                                                                                                                                                                                          |                    |
| Summary of evidence           | 24 | Summarize the main findings including the strength of evidence for each main outcome; consider their relevance to key groups (e.g., healthcare providers, users, and policy makers).                     | 14-15              |

|                |    |                                                                                                                                                               |    |
|----------------|----|---------------------------------------------------------------------------------------------------------------------------------------------------------------|----|
| Limitations    | 25 | Discuss limitations at study and outcome level (e.g., risk of bias), and at review-level (e.g., incomplete retrieval of identified research, reporting bias). | 16 |
| Conclusions    | 26 | Provide a general interpretation of the results in the context of other evidence, and implications for future research.                                       | 16 |
| <b>FUNDING</b> |    |                                                                                                                                                               |    |
| Funding        | 27 | Describe sources of funding for the systematic review and other support (e.g., supply of data); role of funders for the systematic review.                    | 17 |

From: Moher D, Liberati A, Tetzlaff J, Altman DG, The PRISMA Group (2009). Preferred Reporting Items for Systematic Reviews and Meta-Analyses: The PRISMA Statement. PLoS Med 6(7): e1000097. doi:10.1371/journal.pmed1000097

For more information, visit: [www.prisma-statement.org](http://www.prisma-statement.org).

**Supplementary Table 2. Keyword used for search**

|                                                                                                                                                                                            |                                                                                                                                                                                                                                                                                                        |                                                                                                                                                                                                                                                                                 |
|--------------------------------------------------------------------------------------------------------------------------------------------------------------------------------------------|--------------------------------------------------------------------------------------------------------------------------------------------------------------------------------------------------------------------------------------------------------------------------------------------------------|---------------------------------------------------------------------------------------------------------------------------------------------------------------------------------------------------------------------------------------------------------------------------------|
| <p>Occurrence OR<br/> “Prevalence” OR<br/> “Incidence” OR<br/> “Survey” OR<br/> “frequency” OR<br/> “rates or statistics”<br/> OR “performance<br/> indicators” OR<br/> “surveillance”</p> | <p>(Injury AND Needlestick) OR “Needlestick Injury” OR<br/> Needlestick* OR “Needle-Stick*” OR “Needle Stick*” OR (Injuri*<br/> AND Needlestick) OR “Needle-Stick Injuri*” OR “Needle Stick<br/> Injuries” OR “Needle-Stick Injur*” OR “Sharps Injuri*” OR<br/> “Sharp* Injury” OR sharp OR needle</p> | <p>dentists OR nurses OR<br/> Physician OR health workers<br/> OR health professionals OR<br/> (Personnel AND Health) OR “Health<br/> Care Provider*” OR (Provider* AND<br/> Health Care) OR “Healthcare<br/> Provider*” OR (Healthcare Worker*)<br/> OR “Registered Nurse”</p> |
|--------------------------------------------------------------------------------------------------------------------------------------------------------------------------------------------|--------------------------------------------------------------------------------------------------------------------------------------------------------------------------------------------------------------------------------------------------------------------------------------------------------|---------------------------------------------------------------------------------------------------------------------------------------------------------------------------------------------------------------------------------------------------------------------------------|

**Supplementary Table 3. Demographic characteristics of included studies**

| <b>ID</b> | <b>First Author</b>   | <b>Year</b> | <b>Country</b> | <b>Region</b> | <b>SDI status</b> | <b>sampling method</b> | <b>Target population</b>          | <b>Type of Study setting</b> | <b>Participants</b> | <b>Risk of bias</b> |
|-----------|-----------------------|-------------|----------------|---------------|-------------------|------------------------|-----------------------------------|------------------------------|---------------------|---------------------|
| 1         | Abebe, A. M.[1]       | 2018        | Ethiopia       | African       | Low SDI           | Simple Random          | Nurses                            | Single-center                | 151                 | Low                 |
| 2         | Abozead, S. E. S. [2] | 2015        | Jordan         | EMRO          | High middle SDI   | Census                 | Nurses                            | Multi-center                 | 210                 | Low                 |
| 3         | Akgur, M. [3]         | 2012        | Cyprus         | European      | High SDI          | Census                 | Nurses                            | Single-center                | 151                 | Low                 |
| 4         | Al-Dabbas, M. [4]     | 2012        | Palestine      | EMRO          | Low Middle SDI    | Census                 | Medical Students                  | Multi-center                 | 272                 | Low                 |
| 5         | Alemayehu, T. [5]     | 2016        | Ethiopia       | African       | Low SDI           | Simple Random          | Nurse, Physician, Aids            | Multi-center                 | 820                 | Low                 |
| 6         | Alhazmi, R. A. [6]    | 2018        | USA            | Americas      | High SDI          | Simple Random          | Other                             | Multi-center                 | 247                 | Low                 |
| 7         | Ali, F. M. [7]        | 2018        | Saudi Arabia   | EMRO          | High SDI          | Simple Random          | Dental students                   | Single-center                | 230                 | Low                 |
| 8         | Amira, C. O. [8]      | 2014        | Nigeria        | African       | Low middle SDI    | Census                 | Nurse, Physician, Aids            | Multi-center                 | 102                 | Low                 |
| 9         | Askarian, M. [9]      | 2007        | Iran           | EMRO          | High middle SDI   | Simple Random          | nurse, Aids                       | Multi-center                 | 1555                | Low                 |
| 10        | Askarian, M. [10]     | 2012        | Iran           | EMRO          | High middle SDI   | Convenience            | Nursing, dental students          | Multi-center                 | 345                 | Low                 |
| 11        | Askarian, M. [11]     | 2006        | Iran           | EMRO          | High middle SDI   | Convenience            | Nursing, medical, dental students | Single-center                | 688                 | Low                 |
| 12        | Azadi, A. [12]        | 2011        | Iran           | EMRO          | High              | Simple                 | Nurses                            | Multi-center                 | 111                 | Low                 |

|    |                      |      |             |                 |                 |                   |                                    |               |      |     |
|----|----------------------|------|-------------|-----------------|-----------------|-------------------|------------------------------------|---------------|------|-----|
|    |                      |      |             |                 | middle SDI      | Random            |                                    |               |      |     |
| 13 | Balouchi, A. [13]    | 2015 | Iran        | EMRO            | High middle SDI | Simple Random     | Nurses                             | Single-center | 200  | Low |
| 14 | Bathija, G. V. [14]  | 2013 | India       | South-East Asia | Low middle SDI  | Convenience       | Nursing, medical students          | Single-center | 200  | Low |
| 15 | Bekele, T. [15]      | 2015 | Ethiopia    | African         | Low SDI         | Convenience       | HCWs                               | Multi-center  | 340  | Low |
| 16 | Belachew, Y.B. [16]  | 2017 | Ethiopia    | African         | Low SDI         | Census            | Nurses                             | Multi-center  | 318  | Low |
| 17 | Bhardwaj, A. [17]    | 2014 | Malaysia    | Western Pacific | High middle SDI | Census            | Nurse, Physician                   | Single-center | 153  | Low |
| 18 | Chalya, P. L. [18]   | 2015 | Tanzania    | African         | Low SDI         | Census            | nurse, Physician, Aids , others    | Single-center | 436  | Low |
| 19 | Chen, L [19]         | 2009 | China       | Western Pacific | High middle SDI | Census            | Nurse, Physician, others           | Multi-center  | 831  | Low |
| 20 | Cheung, K. [20]      | 2012 | China       | Western Pacific | High middle SDI | Convenience       | Nursing Students                   | Multi-center  | 877  | Low |
| 21 | Cho, E. [21]         | 2013 | South Korea | Western Pacific | High SDI        | Stratified Random | Nurses                             | Multi-center  | 3079 | Low |
| 22 | Choi, L. Y. [22]     | 2017 | USA         | Americas        | High SDI        | Census            | Nurse, Physician, Medical Students | Single-center | 195  | Low |
| 23 | Clarke, S. P. [23]   | 2002 | USA         | Americas        | High SDI        | Census            | Nurses                             | Multi-Centre  | 2287 | Low |
| 24 | Cui, Z. [24]         | 2018 | China       | Western Pacific | High middle SDI | Census            | Nurse, Physician                   | Single-center | 901  | Low |
| 25 | Deipolyi, A. R. [25] | 2017 | USA         | Americas        | High SDI        | Census            | Other                              | Multi-Centre  | 895  | Low |
| 26 | Deisenhammer,        | 2006 | Germany     | European        | High SDI        | Census            | Medical Students                   | Multi-Centre  | 1317 | Low |

|    |                         |      |                |                 |                 |                   |                          |               |      |     |
|----|-------------------------|------|----------------|-----------------|-----------------|-------------------|--------------------------|---------------|------|-----|
|    | S. [26]                 |      |                |                 |                 |                   |                          |               |      |     |
| 27 | Donnelly, A. F. [27]    | 2013 | USA            | Americas        | High SDI        | Census            | Physicians               | Multi-center  | 336  | Low |
| 28 | Ebrahimi, H. [28]       | 2007 | Iran           | EMRO            | High middle SDI | Census            | Nurses                   | Single-center | 180  | Low |
| 29 | Ehsani, S. R. [29]      | 2013 | Iran           | EMRO            | High middle SDI | Census            | Nurses                   | Multi-center  | 328  | Low |
| 30 | Elmiyeh, B [30]         | 2004 | United Kingdom | European        | High SDI        | Census            | HCWs                     | Multi-center  | 279  | Low |
| 31 | Fareed, G. [31]         | 2013 | Saudi Arabia   | EMRO            | High SDI        | Census            | Nursing Students         | Single-center | 100  | Low |
| 32 | Fullerton, M. [32]      | 2011 | New Zealand    | Western Pacific | High SDI        | Census            | Nurse, Physician, others | Multi-center  | 1346 | Low |
| 33 | Galougahi, M. H. [33]   | 2010 | Iran           | EMRO            | High middle SDI | Consecutive       | Nurses                   | Single-center | 158  | Low |
| 34 | Garcia, V. H. [34]      | 2017 | Mexico         | Americas        | High middle SDI | Census            | HCWs                     | Multi-center  | 467  | Low |
| 35 | Garus-Pakowska, A. [35] | 2018 | Poland         | European        | High SDI        | UK                | Dentists                 | Multi-center  | 198  | Low |
| 36 | Ghasemi, M. [36]        | 2017 | Iran           | EMRO            | High middle SDI | Stratified Random | Nurses                   | Single-center | 267  | Low |
| 37 | Ghasemzadeh, I. [37]    | 2015 | Iran           | EMRO            | High middle SDI | Census            | Nurse, Medical Students  | Single-center | 377  | Low |
| 38 | Guest, M. [38]          | 2010 | Australia      | Western Pacific | High SDI        | Stratified Random | Nurses                   | Single-center | 1301 | Low |
| 39 | Habib, H. [39]          | 2011 | Pakistan       | EMRO            | Low middle      | Simple            | Nurses                   | Single-center | 216  | Low |

|    |                      |      |          |                 | SDI             | Random             |                          |               |      |     |
|----|----------------------|------|----------|-----------------|-----------------|--------------------|--------------------------|---------------|------|-----|
| 40 | Hamid, M. Z. A. [40] | 2011 | Malaysia | Western Pacific | High middle SDI | Universal sampling | Nurse, Physician         | Multi-center  | 215  | Low |
| 41 | Hanafi, M. I. [41]   | 2011 | Egypt    | EMRO            | Low middle SDI  | Census             | Nurse, Physician, others | Multi-center  | 645  | Low |
| 42 | Hassnain, S. [42]    | 2017 | Pakistan | EMRO            | Low middle SDI  | Simple Random      | Nurses                   | Multi-center  | 386  | Low |
| 43 | Honda, M. [43]       | 2011 | Thailand | South-East Asia | High middle SDI | Stratified Random  | Nurses                   | Multi-center  | 250  | Low |
| 44 | Ibekwe, R. U. [44]   | 2014 | Nigeria  | African         | Low middle SDI  | Census             | Physicians               | Multi-center  | 152  | Low |
| 45 | Ikram, K. [45]       | 2015 | Pakistan | EMRO            | Low middle SDI  | Census             | Dentists                 | Multi-center  | 800  | Low |
| 46 | Ilhan, M. N. [46]    | 2006 | Turkey   | European        | High middle SDI | Census             | Nurses                   | Multi-center  | 449  | Low |
| 47 | Irmak, Z. [47]       | 2012 | Turkey   | European        | High middle SDI | Census             | Nurses                   | Multi-center  | 143  | Low |
| 48 | Irmak, Z. [48]       | 2011 | Turkey   | European        | High middle SDI | Census             | Nursing Students         | Single-center | 310  | Low |
| 49 | Jahangiri, M. [49]   | 2016 | Iran     | EMRO            | High middle SDI | Simple Random      | Nurses                   | Multi-center  | 168  | Low |
| 50 | Joukar, F. [50]      | 2018 | Iran     | EMRO            | High middle SDI | Consecutive        | Nurses                   | Multi-center  | 1010 | Low |
| 51 | Kasatpibal, N. [51]  | 2016 | Thailand | South-East Asia | High middle SDI | Stratified Random  | Nurses                   | Multi-center  | 2031 | Low |
| 52 | Kebede, A. [52]      | 2012 | Ethiopia | African         | Low SDI         | Simple Random      | nurse, Physician, Aids   | Multi-center  | 344  | Low |



|    |                       |      |                        |                 |                 |                    |                                           |               |     |     |
|----|-----------------------|------|------------------------|-----------------|-----------------|--------------------|-------------------------------------------|---------------|-----|-----|
| 53 | Kebede, A. [53]       | 2018 | Ethiopia               | African         | Low SDI         | Simple Random      | Nurses                                    | Multi-center  | 252 | Low |
| 54 | Khader, Y. [54]       | 2009 | Jordan                 | EMRO            | High middle SDI | Simple Random      | Dentists                                  | Multi-center  | 170 | Low |
| 55 | Khurram, M. [55]      | 2011 | Pakistan               | EMRO            | Low middle SDI  | Census             | Physicians                                | Single-center | 309 | Low |
| 56 | Khushdil, A. [56]     | 2013 | Pakistan               | EMRO            | Low middle SDI  | Census             | Nurses                                    | Multi-center  | 118 | Low |
| 57 | Lee, J. M. [57]       | 2005 | USA                    | Americas        | High SDI        | Census             | Nurses                                    | Multi-center  | 313 | Low |
| 58 | Lee, L. K. [58]       | 2005 | Malaysia               | Western Pacific | High middle SDI | Simple Random      | Nurse, Physician, Medical Students        | Multi-center  | 285 | Low |
| 59 | Liyanage IK [59]      | 2012 | Sri Lanka              | South-East Asia | Low middle SDI  | Census             | Medical Students                          | Single-center | 168 | Low |
| 60 | Moro, P. L. [60]      | 2007 | Dominican Republic     | Americas        | High middle SDI | Simple Random      | Nurse, Physician, others                  | Multi-center  | 440 | Low |
| 61 | Muralidhar, S. [61]   | 2010 | India                  | South-East Asia | Low middle SDI  | Census             | Nurse, Physician, Nurse, Medical students | Single-center | 428 | Low |
| 62 | Musa, S. [62]         | 2014 | Bosnia and Herzegovina | European        | High middle SDI | Simple Random      | nurse, Physician, Aids                    | Single-center | 203 | Low |
| 63 | Newsom, D. H. [63]    | 2002 | Uganda                 | African         | Low SDI         | Consecutive        | nurse, Physician, medical students, other | Single-center | 180 | Low |
| 64 | Ng, Y.W. [64]         | 2007 | Malaysia               | Western Pacific | High middle SDI | Convenience        | Nurse, Physician, others                  | Multi-center  | 136 | Low |
| 65 | Norsayani, M. Y. [65] | 2003 | Malaysia               | Western Pacific | High middle SDI | Universal sampling | Medical Students                          | Multi-center  | 417 | Low |

|    |                       |      |              |                 |                 |               |                                |               |      |     |
|----|-----------------------|------|--------------|-----------------|-----------------|---------------|--------------------------------|---------------|------|-----|
| 66 | Nsubuga, F. M. [66]   | 2005 | Uganda       | African         | Low SDI         | Census        | nurse, Aids, others            | Single-center | 526  | Low |
| 67 | Paul, T. [67]         | 2000 | Saudi Arabia | EMRO            | High SDI        | Census        | Dentists                       | Multi-center  | 112  | Low |
| 68 | Pavithran, V. K. [68] | 2015 | India        | South-East Asia | Low middle SDI  | Convenience   | Dentists                       | Multi-center  | 200  | Low |
| 69 | Rampal, L. [69]       | 2010 | Malaysia     | Western Pacific | High middle SDI | Simple Random | Nurse, Physician, others       | Single-center | 345  | Low |
| 70 | Reddy, S. [70]        | 2018 | USA          | Americas        | High SDI        | Consecutive   | Other                          | Multi-center  | 282  | Low |
| 71 | Salmanzadeh, S. [71]  | 2016 | Iran         | EMRO            | High middle SDI | Simple Random | nurse, Physician, Aids, others | Single-center | 377  | Low |
| 72 | Seng, M. [72]         | 2013 | Singapore    | Western Pacific | High SDI        | Simple Random | Medical Students               | Single-center | 228  | Low |
| 73 | Seng, M. [73]         | 2016 | Singapore    | Western Pacific | High SDI        | Simple Random | nurse, Physician, Aids, others | Multi-center  | 5957 | Low |
| 74 | Shah, S. F. [74]      | 2006 | Qatar        | EMRO            | High SDI        | Simple Random | Nurse, Physician, others       | Single-center | 1022 | Low |
| 75 | Shiao, J. S. [75]     | 2002 | Taiwan       | South-East Asia | High SDI        | Simple Random | Nursing Students               | Multi-center  | 572  | Low |
| 76 | Shiva, F. [76]        | 2011 | Iran         | EMRO            | High middle SDI | Simple Random | Nurse, Physician               | Multi-center  | 355  | Low |
| 77 | Small, L. [77]        | 2011 | Namibia      | African         | High middle SDI | Convenience   | Nursing Students               | Single-center | 198  | Low |
| 78 | Smith, D. R. [78]     | 2006 | Australia    | Western Pacific | High SDI        | Convenience   | Nurses                         | Multi-center  | 220  | Low |
| 79 | Smith, D. R. [79]     | 2005 | Australia    | Western Pacific | High SDI        | Convenience   | Nursing Students               | Single-center | 274  | Low |

|    |                      |      |          |                 |                 |               |                          |               |      |     |
|----|----------------------|------|----------|-----------------|-----------------|---------------|--------------------------|---------------|------|-----|
| 80 | Suliman, M. [80]     | 2018 | Jordan   | EMRO            | High middle SDI | Convenience   | Nursing Students         | Multi-center  | 279  | Low |
| 81 | Swe, K. M. M. [81]   | 2012 | Malaysia | Western Pacific | High middle SDI | Census        | Medical Students         | Single-center | 456  | Low |
| 82 | Trinkoff, A. M. [82] | 2007 | USA      | Americas        | High SDI        | Convenience   | Nurses                   | Multi-center  | 2237 | Low |
| 83 | Wang, S. [83]        | 2012 | China    | Western Pacific | High middle SDI | Convenience   | Nurses                   | Single-center | 458  | Low |
| 84 | Wicker, S. [84]      | 2008 | Germany  | European        | High SDI        | Convenience   | Nurse, Physician, others | Single-center | 720  | Low |
| 85 | Winifred, LB. [85]   | 2008 | USA      | Americas        | High SDI        | Simple Random |                          | Multi-center  | 2664 | Low |
| 86 | Xujun, Z. [86]       | 2015 | China    | Western Pacific | High middle SDI | Convenience   | Nurses                   | Single-center | 402  | Low |
| 87 | Yao, W. X. [87]      | 2010 | China    | Western Pacific | High middle SDI | Convenience   | Nursing Students         | Multi-center  | 246  | Low |

UK: unknown, M: month

**Supplementary Figure 1. Global Prevalence of NSIs injuries among health care workers based on gender**

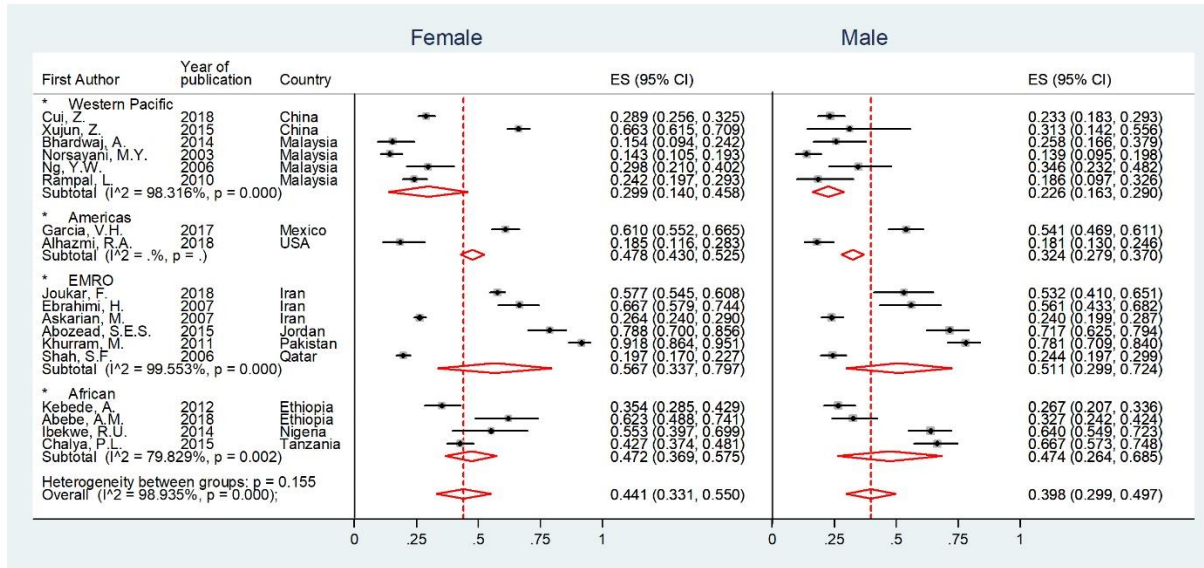

**Supplementary Table 4; Global Prevalence of Needle sticks injuries in two time period and prevalence trend by WHO region**

|                        | 2000-2010 |                          |                    | 2010-2018 |                          |                    | Prevalence trend |                   |              |
|------------------------|-----------|--------------------------|--------------------|-----------|--------------------------|--------------------|------------------|-------------------|--------------|
|                        | N         | Pooled ES, %<br>(95% CI) | I <sup>2</sup> , % | N         | Pooled ES, %<br>(95% CI) | I <sup>2</sup> , % | Coef.*, %        | 95% CI for Coef.  | P-value      |
| <b>America</b>         | 5         | 17.0 (11.5, 22.6)        | 98.3               | 6         | 57.5 (32.8, 82.2)        | 99.6               | 3.5              | 0.81, 6.2         | 0.016        |
| <b>Africa</b>          | 5         | 45.9 (31.1, 60.7)        | 97.0               | 7         | 38.7 (30.2, 47.3)        | 94.7               | -0.90            | -2.7, 0.87        | 0.283        |
| <b>EMRO</b>            | 7         | 49.0 (31.5, 66.4)        | 99.2               | 21        | 55.0 (45.7, 61.3)        | 98.2               | -0.22            | -1.9, 1.5         | 0.794        |
| <b>Europe</b>          | 4         | 44.7 (24.0, 65.5)        | 99.4               | 5         | 46.8 (25.3, 68.2)        | 98.3               | 0.90             | -3.1, 4.9         | 0.612        |
| <b>South-East Asia</b> | 2         | 71.3 (68.6, 74.1)        | NA                 | 5         | 53.1 (23.6, 82.6)        | 99.6               | -2.0             | -7.6, 3.6         | 0.392        |
| <b>Western Pacific</b> | 9         | 35.4 (0.0, 72.0)         | 99.9               | 11        | 27.1 (12.5, 41.8)        | 99.8               | 0.47             | -3.2, 4.1         | 0.791        |
| <b>Global</b>          | <b>29</b> | <b>40.8 (23.4, 58.3)</b> | <b>99.9</b>        | <b>58</b> | <b>46.3 (37.9, 54.7)</b> | <b>99.8</b>        | <b>0.71</b>      | <b>-0.43, 1.8</b> | <b>0.219</b> |

\* Coefficient of meta-regression analysis; ES: Effect size; CI: Confidence interval

Supplementary Figure 2. Global Prevalence of Needlestick injuries (NSIs) among Nurses

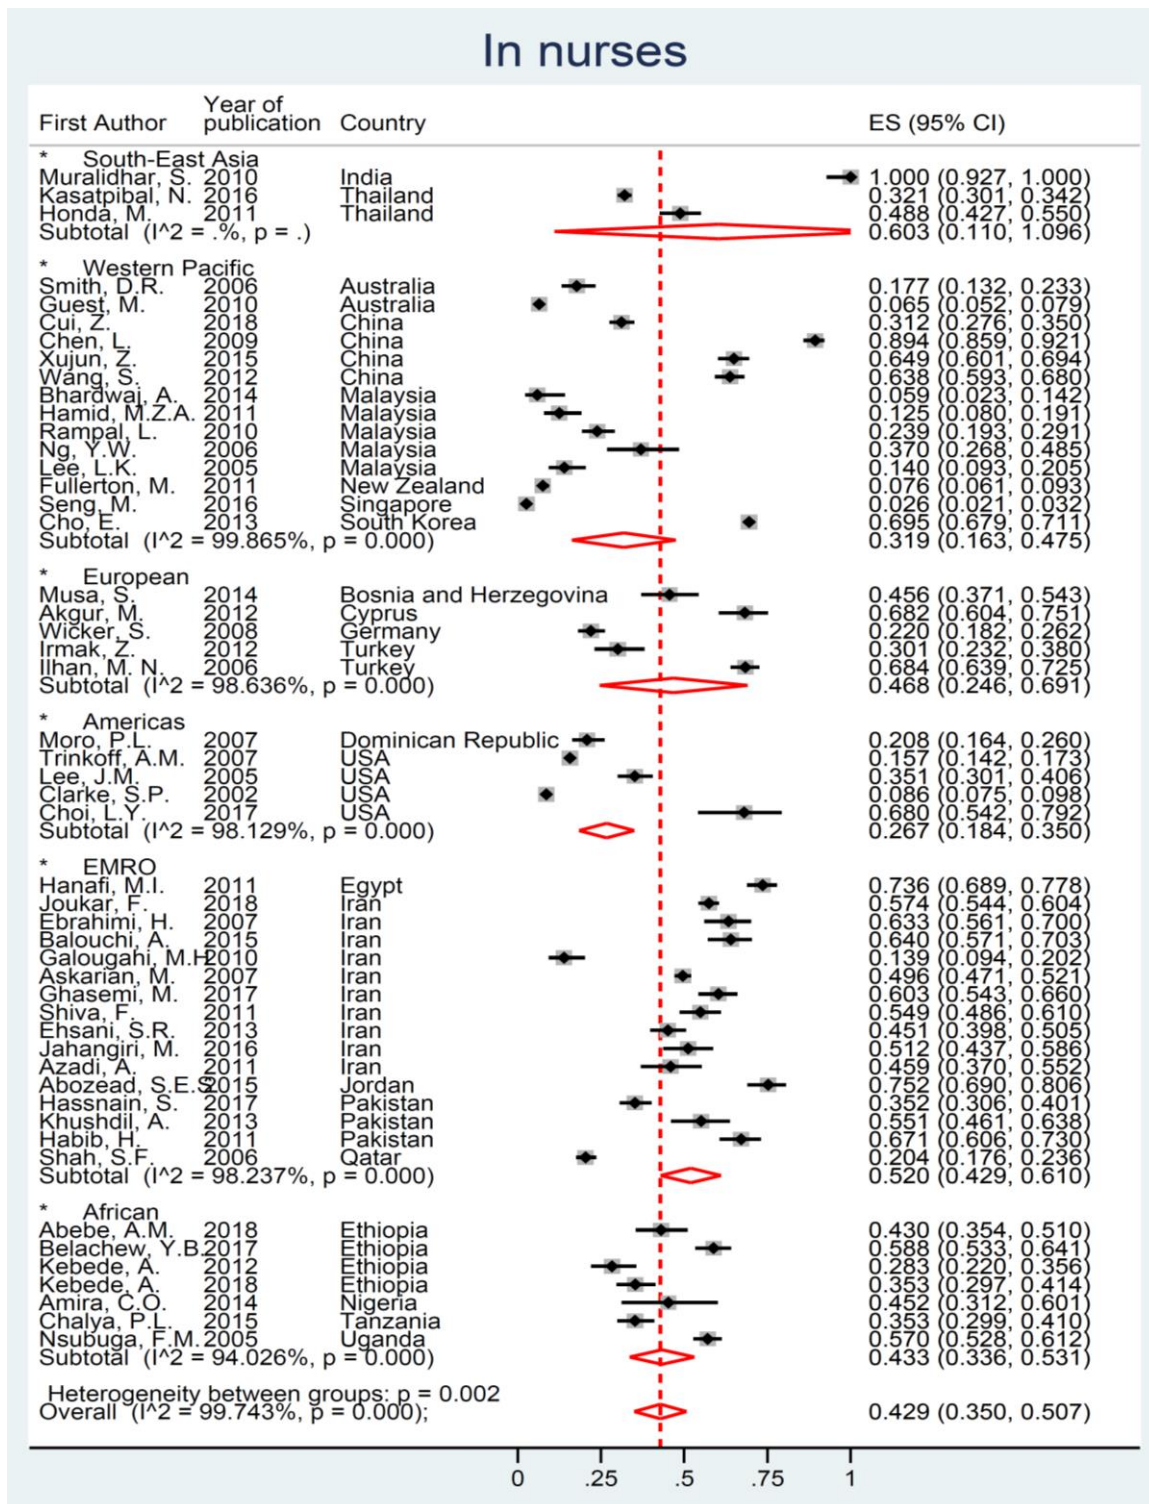

**Supplementary Figure 3. Global Prevalence of Needlestick injuries (NSIs) among physicians**

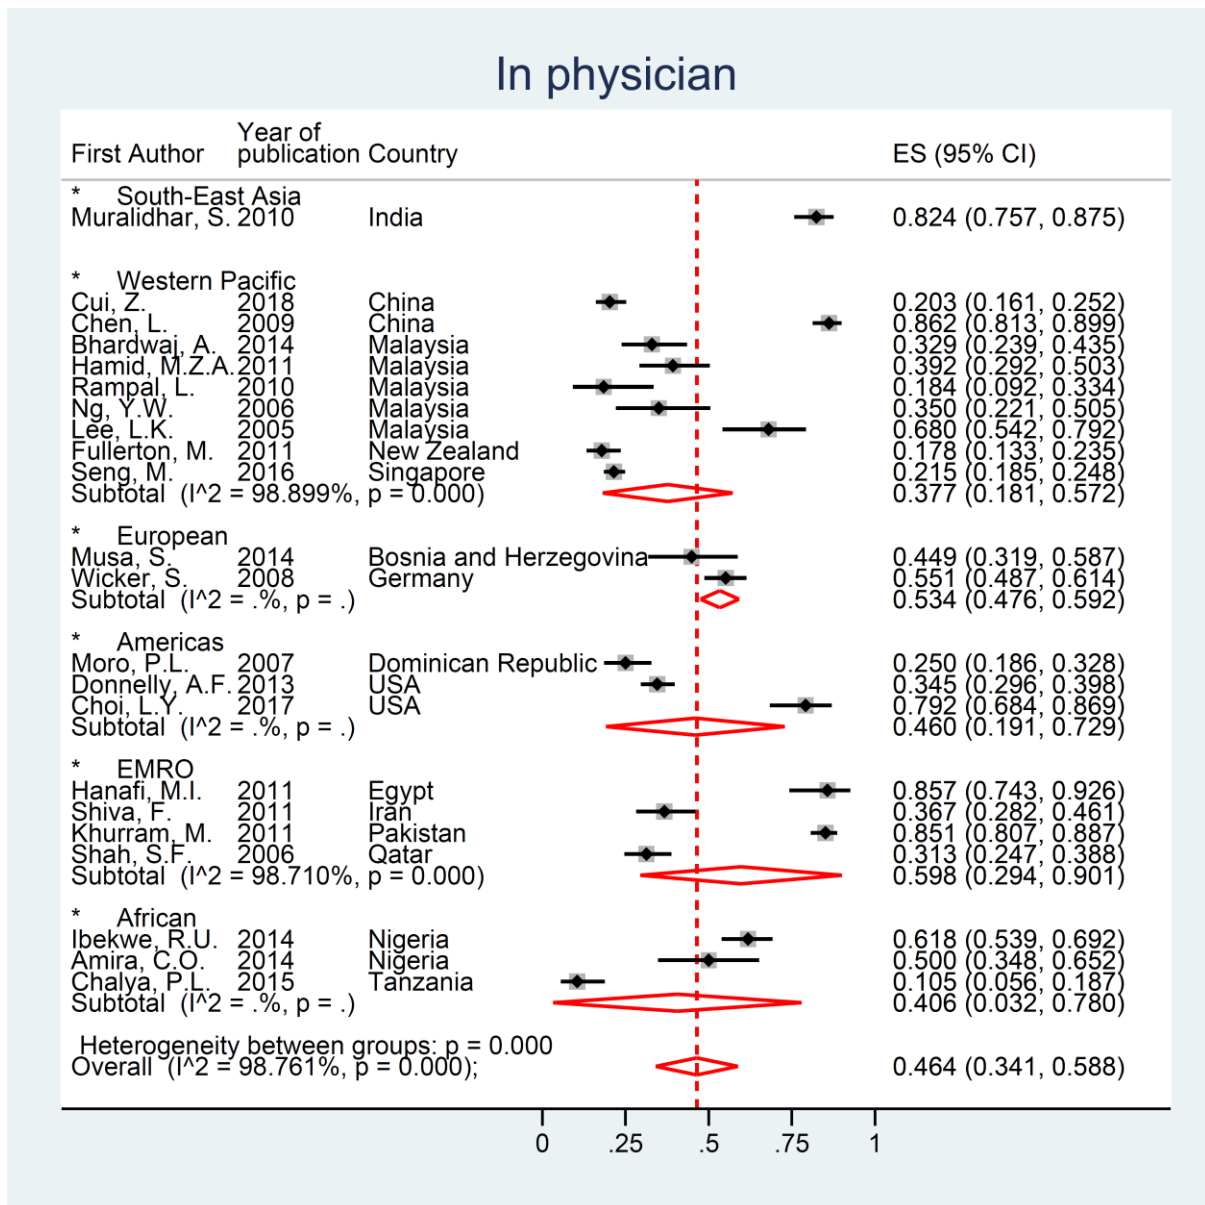

## References

- .1 Abebe AM, Kassaw MW, Shewangashaw NE. Prevalence of needle-stick and sharp object injuries and its associated factors among staff nurses in Dessie referral hospital Amhara region, Ethiopia, 2018. *BMC research notes* **2018**; 11(1): 840.
- .2 Abozead SES, Abuhaseesh M, Nawafleh H, Kawafha MM, Al-Tarawneh O. Knowledge and practices of Jordanian nurses on needlestick injuries: An evaluative study. *Infect Dis Clin Pract* **2015**; 23(1): 21-5.
- .3 Akgur M, Dal U. The prevalence of needle stick and sharps injuries in nurses in North Cyprus. *Pak J Med Sci* **2012**; 28(3): 437-40.
- .4 Al-Dabbas M, Abu-Rmeileh NME. Needlestick injury among interns and medical students in the Occupied Palestinian Territory. *East Mediterr Health J* **2012**; 18(7): 700-6.
- .5 Alemayehu T, Worku A, Assefa N. Sharp Injury and Exposure to Blood and Body Fluids among Health Care Workers in Health Care Centers of Eastern Ethiopia. *The international journal of occupational and environmental medicine* **2016**; 7(3): 172-80.
- .6 Alhazmi RA, Parker RD, Wen S. Needlestick Injuries Among Emergency Medical Services Providers in Urban and Rural Areas. *Journal of Community Health* **2018**; 43(3): 518-23.
- .7 Ali FM, Al-Iryani GM, Mdabesh HY, et al. Incidence of needlestick injuries in oral surgery clinic among dental students: A retrospective study. *World J Dent* **2018**; 9(1): 29-33.
- .8 Amira CO, Awobusuyi JO. Needle-stick injury among health care workers in hemodialysis units in Nigeria: a multi-center study. *The international journal of occupational and environmental medicine* **2014**; 5(1): 1-8.
- .9 Askarian M, Shaghaghian S, McLaws ML. Needlestick injuries among nurses of Fars province, Iran. *Annals of epidemiology* **2007**; 17(12): 988-92.
- .10 Askarian M, Malekmakan L, Memish ZA, Assadian O. Prevalence of needle stick injuries among dental, nursing and midwifery students in Shiraz, Iran. *GMS Krankenhaushygiene interdisziplinär* **2012**; 7(1): Doc05.
- .11 Askarian M, Malekmakan L. The prevalence of needle stick injuries in medical, dental, nursing and midwifery students at the University Teaching Hospitals of Shiraz, Iran. *Indian J Med Sci* **2006**; 60(6): 227-32.
- .12 Azadi A, Anoosheh M, Delpisheh A. Frequency and barriers of underreported needlestick injuries amongst Iranian nurses, a questionnaire survey. *Journal of clinical nursing* **2011** ; .93-488 :(4-3)20
- .13 Balouchi A, Shahdadi H, Ahmadidarrehshima S, Rafiemanesh H. The Frequency, Causes and Prevention of Needlestick Injuries in Nurses of Kerman: A Cross-Sectional Study. *J Clin Diagn Res* **2015**; 9(12): Dc13-5.
- .14 Bathija GV, Bant DD, Itagimath SR. A study on prevalence of needle stick injuries among junior doctors and nursing students in Kims, Hubli. *Indian J Public Health Res Dev* **2013**; 4(2): 84-8.
- .15 Bekele T, Gebremariam A, Kaso M, Ahmed K. Attitude, reporting behaviour and management practice of occupational needle stick and sharps injuries among hospital healthcare workers in Bale zone, Southeast Ethiopia: a cross-sectional study. *Journal of occupational medicine and toxicology (London, England)* **2015**; 10: 42.
- .16 Belachew YB, Lema TB, Germossa GN, Adinew YM. Blood/Body Fluid Exposure and Needle Stick/Sharp Injury among Nurses Working in Public Hospitals; Southwest Ethiopia. *Frontiers in public health* **2017**; 5: 299.
- .17 Bhardwaj A, Sivapathasundaram N, Yusof M, Minghat A, Swe K, Sinha N. The Prevalence of Accidental Needle Stick Injury and their Reporting among Healthcare Workers in Orthopaedic Wards in General Hospital Melaka, Malaysia. *Malaysian orthopaedic journal* **2014**; 8(2): 6-13.



- .18 Chalya PL, Seni J, Mushi MF, et al. Needle-stick injuries and splash exposures among health-care workers at a tertiary care hospital in north-western Tanzania. *Tanzan J Health Res* **2015**; 17.(2)
- .19 Chen L, Zhang M, Yan Y, et al. Sharp object injuries among health care workers in a Chinese province. *AAOHN journal : official journal of the American Association of Occupational Health Nurses* **2009**; 57(1): 13-6.
- .20 Cheung K, Ching SS, Chang KK, Ho SC. Prevalence of and risk factors for needlestick and sharps injuries among nursing students in Hong Kong. *American journal of infection control* **2012**; 40(10): 997-1001.
- .21 Cho E, Lee H, Choi M, Park SH, Yoo IY, Aiken LH. Factors associated with needlestick and sharp injuries among hospital nurses: a cross-sectional questionnaire survey. *International journal of nursing studies* **2013**; 50(8): 1025-32.
- .22 Choi LY, Torres R, Syed S, et al. Sharps and Needlestick Injuries Among Medical Students, Surgical Residents, Faculty, and Operating Room Staff at a Single Academic Institution. *Journal of surgical education* **2017**.6-131 :(1)74 ;
- .23 Clarke SP, Rockett JL, Sloane DM, Aiken LH. Organizational climate, staffing, and safety equipment as predictors of needlestick injuries and near-misses in hospital nurses. *American journal of infection control* **2002**; 30(4): 207-16.
- .24 Cui Z, Zhu J, Zhang X, Wang B, Li X. Sharp injuries: a cross-sectional study among health care workers in a provincial teaching hospital in China. *Environmental health and preventive medicine* **2018**; 23(1): 2.
- .25 Deipolyi AR, Prabhakar AM, Naidu S, Oklu R .Needlestick Injuries in Interventional Radiology Are Common and Underreported. *Radiology* **2017**; 285(3): 870-5.
- .26 Deisenhammer S, Radon K, Nowak D, Reichert J. Needlestick injuries during medical training. *J Hosp Infect* **2006**; 63(3): 263-7.
- .27 Donnelly AF, Chang YH, Nemeth-Ochoa SA. Sharps injuries and reporting practices of U.S. dermatologists. *Dermatologic surgery : official publication for American Society for Dermatologic Surgery [et al]* **2013**; 39(12): 1813-21.
- .28 Ebrahimi H, Khosravi A. Needlestick Injuries among Nurses. *Journal of research in health sciences* **2007**; 7(2): 56-62.
- .29 Ehsani SR, Mohammadnejad E, Hadizadeh MR, et al. Epidemiology of needle sticks and sharp injuries among nurses in an Iranian Teaching Hospital. *Arch Clin Infect Dis* **2013**.30-27 :(1)8 ;
- .30 Elmiyeh B, Whitaker IS, James MJ, Chahal CA, Galea A, Alshafi K. Needle-stick injuries in the National Health Service: a culture of silence. *Journal of the Royal Society of Medicine* **2004**; 97(7): 326-7.
- .31 Fareed G, Hussain A, Jameel A ,Akhtar M, Hussain A, Taj S. Knowledge, attitude and practices among nursing students on needle-stick injuries. *Pak J Med Health Sci* **2013**; 7.(2)
- .32 Fullerton M, Gibbons V. Needlestick injuries in a healthcare setting in New Zealand. *New Zealand Med J* **2011**.9-33 :(1335)124 ;
- .33 Galouhahi MH. Evaluation of needle stick injuries among nurses of Khanevadeh Hospital in Tehran. *Iranian journal of nursing and midwifery research* **2010**; 15(4): 172-7.
- .34 Garcia VH, Radon K. Preventive training among medical interns in Mexico city and its association with needlestick and sharp injuries – A cross sectional study. *J Clin Diagn Res* **2017**; 11(3): IC05-IC7.
- .35 Garus-Pakowska A, Górajski M, Gaszyńska E. Occupational safety and hygiene of dentists from urban and rural areas in terms of sharp injuries: Wound structure, causes of injuries and barriers to reporting—cross-sectional study, Poland. *Int J Environ Res Public Health* **2018**; 15.(8)
- .36 Ghasemi M, Khabazkhoob M, Hashemi H, Yekta A, Nabovati P. The incidence of needle stick and sharp injuries and their associations with visual function among hospital nurses. *Journal of current ophthalmology* **2017**; 29(3): 214-20.

- .37 Ghasemzadeh I, Kazerooni M, Davoodian P, Hamed Y, Sadeghi P. Sharp Injuries Among Medical Students. *Glob J Health Sci* **2015**; 7(5): 320-5.
- .38 Guest M, Kable A, McLeod M. A survey of sharps including needlestick injuries in nurses in New South Wales, Australia. *Healthc Infect* **2010**; 15(3): 77-83.
- .39 Habib H, Khan EA, Aziz A. Prevalence and factors associated with needle stick injuries among registered nurses in public sector tertiary care hospitals of Pakistan. *Int J Collab Res Intern Med Public Health* **2011**; 3(2): 124-30.
- .40 Hamid MZA, Aziz NA, Lim WB, et al. Prevalence of Needle Stick Injuries and Compliance to Infection Control Guidelines Among Health Care Workers in a Teaching Hospital, Malaysia. *Malays J Med Health Sci* **2011**; 7(1): 3-7.
- .41 Hanafi MI, Mohamed AM, Kassem MS, Shawki M. Needlestick injuries among health care workers of University of Alexandria hospitals. *East Mediterr Health J* **2011**; 17(1): 26-35.
- .42 Hassnain S, Hassan Z, Amjad S, Zulqarnain M, Arshad K, Zain Z. Needle stick injuries among nurses of two tertiary care hospitals of Lahore: A KAP study. *JPMA The Journal of the Pakistan Medical Association* **2017**; 67(12): 1874-8.
- .43 Honda M, Chompikul J, Rattanapan C, Wood G, Klungboonkrong S. Sharps injuries among nurses in a Thai regional hospital: prevalence and risk factors. *The international journal of occupational and environmental medicine*.23-215 :(4)2 ;2011
- .44 Ibekwe RU, Adam VY. Injection safety practices among resident doctors in a tertiary health facility in Benin City. *Nigerian journal of clinical practice* **2014**; 17(4): 403-6.
- .45 Ikram K, Siddiqui HK, Maqbool S, Altaf M, Khan S. Frequency of needle stick injury among dental students and dentists of Karachi. *World J Dent* **2015**; 6(4): 213-6.
- .46 Ilhan MN, Durukan E, Aras E, Turkcuoglu S, Aygun R. Long working hours increase the risk of sharp and needlestick injury in nurses: the need for new policy implication. *Journal of advanced nursing* **2006**; 56(5): 563-8.
- .47 Irmak Z. Needlestick and sharps injury among nurses at a state hospital in Turkey. *Aus J Adv Nurs* **2012**; 30(2): 48-55.
- .48 Irmak Z, Baybuga MS. Needlestick and sharps injuries among Turkish nursing students: A cross-sectional study. *Int J Nurs Pract* **2011**; 17(2): 151-7.
- .49 Jahangiri M, Rostamabadi A, Hoboubi N, Tadayon N, Soleimani A. Needle Stick Injuries and their Related Safety Measures among Nurses in a University Hospital, Shiraz, Iran. *Safety and health at work* **2016**; 7(1): 72-7.
- .50 Joukar F, Mansour-Ghanaei F, Naghipour M, Asgharnezhad M. Needlestick Injuries among Healthcare Workers: Why They Do Not Report their Incidence? *Iranian journal of nursing and midwifery research*.7-382 :(5)23 ;2018
- .51 Kasatpibal N, Whitney JD, Katechanok S, et al. Prevalence and risk factors of needlestick injuries, sharps injuries, and blood and body fluid exposures among operating room nurses in Thailand. *American journal of infection control*.90-85 :(1)44 ;2016
- .52 Kebede G, Molla M, Sharma HR. Needle stick and sharps injuries among health care workers in Gondar city, Ethiopia. *Saf Sci* **2012**; 50(4): 1093-7.
- .53 Kebede A, Gerense H. Prevalence of needle stick injury and its associated factors among nurses working in public hospitals of Dessie town, Northeast Ethiopia, 2016. *BMC research notes* **2018**; 11(1): 413.
- .54 Khader Y, Burgan S, Amarin Z. Self-reported needle-stick injuries among dentists in north Jordan. *Eastern Mediterranean health journal = La revue de sante de la Mediterranee orientale = al-Majallah al-sihhiyah li-sharq al-mutawassit* **2009**; 15(1): 185-9.
- .55 Khurram M, Ijaz K, Bushra HT, Khan NY, Bushra H, Hussain W. Needlestick injuries: a survey of doctors working at Tertiary Care Hospitals of Rawalpindi. *JPMA The Journal of the Pakistan Medical Association* **2011**; 61(1): 63-5.
- .56 Khushdil A, Farrukh H, Sabir MD, Awan T, Qureshi T. Needle stick injuries in nurses at a tertiary health care facility. *J Postgrad Med Inst* **2013**; 27(4): 38.6-1

- .57 Lee JM, Botteman MF, Nicklasson L, Cobden D, Pashos CL. Needlestick injury in acute care nurses caring for patients with diabetes mellitus: a retrospective study. *Current medical research and opinion* **2005**; 21(5): 741-7.
- .58 Lee LK, Noor Hassim I. Implication of the prevalence of needlestick injuries in a general hospital in Malaysia and its risk in clinical practice. *Environ Health Prev Med* **2005**; 10(1): 33-41.
- .59 Liyanage IK, Caldera T, Rwma R, Liyange C, De Silva P, Karunathilake I. Sharps injuries among medical students in the Faculty of Medicine, Colombo, Sri Lanka. *Int J Occup Med Environ Health* **2012**; 25(3): 275-80.
- .60 Moro PL, Moore A, Balcacer P, et al. Epidemiology of needlesticks and other sharps injuries and injection safety practices in the Dominican Republic. *American journal of infection control* **2007**; 35(8): 552-9.
- .61 Muralidhar S, Singh PK, Jain RK, Malhotra M, Bala M. Needle stick injuries among health care workers in a tertiary care hospital of India. *The Indian journal of medical research* **2010**; 131: 405-10.
- .62 Musa S, Peek-Asa C, Young T, Jovanovic N. Needle Stick Injuries, Sharp Injuries and other Occupational Exposures to Blood and Body Fluids among Health Care Workers in a general hospital in Sarajevo, Bosnia and Herzegovina. *International journal of occupational safety and health* **2014**; 4(1): 31-7.
- .63 Newsom DH, Kiwanuka JP. Needle-stick injuries in an Ugandan teaching hospital. *Annals of tropical medicine and parasitology* **2002**; 96(5): 517-22.
- .64 Ng YW, Noor Hassim I. Needlestick injury among medical personnel in accident and emergency department of two teaching hospitals. *Med J Malays* **2007**; 62(1): 9-12.
- .65 Norsayani MY, Hassim IN. Study on incidence of needle stick injury and factors associated with this problem among medical students. *J Occup Health* **2003**; 45(3): 172-8.
- .66 Nsubuga FM, Jaakkola MS. Needle stick injuries among nurses in sub-Saharan Africa. *Tropical medicine & international health : TM & IH* **2005**; 10(8): 773-81.
- .67 Paul T, Omar R, Maktabi A. Self-reported needlestick injuries in dental health care workers at Armed Forces Hospital Riyadh, Saudi Arabia. *Mil Med* **2000**; 165(3): 208-10.
- .68 Pavithran VK, Murali R, Krishna M, Shamala A, Yalamalli M, Kumar AV. Knowledge, attitude, and practice of needle stick and sharps injuries among dental professionals of Bangalore, India. *Journal of International Society of Preventive & Community Dentistry* **2015**; 5(5): 406-12.
- .69 Rampal L, Zakaria R, Sook LW, Zain AM. Needle stick and sharps injuries and factors associated among health care workers in a Malaysian hospital. *Eur J Soc Sci* **2010**; 13(3): 354-62.
- .70 Reddy S, Joseph V, Liu Z, Straker T. Characteristics of sharp injuries in anaesthesia providers in New York state: A cross-sectional study. *J Clin Diagn Res* **2018**; 12(1.10-6):(2
- .71 Salmanzadeh S, Rahimi Z, Goshtasbipour M, Meripoor M. The Prevalence of Needle-Stick Injuries among Healthcare Workers in Dasht-e-Azadegan, Southern West of Iran. *International Journal of Pharmaceutical Research and Allied Sciences* **2016**; 5(2.22-417):(
- .72 Seng M, Lim JW, Sng J, Kong WY, Koh D. Incidence of needlestick injuries among medical students after implementation of preventive training. *Singapore Med J* **2013**; 54(9): 496-500.
- .73 Seng M, Sng GJ, Zhao X, Venkatachalam I, Salmon S, Fisher D. Needlestick injuries at a tertiary teaching hospital in Singapore. *Epidemiol Infect* **2016**; 144(12): 2546-51.
- .74 Shah SF, Bener A, Al-Kaabi S, Al Khal AL, Samson S. The epidemiology of needle stick injuries among health care workers in a newly developed country. *Saf Sci* **2006**; 44(5): 387-94.
- .75 Shiao JS, McLaws ML, Huang KY, Guo YL. Student nurses in Taiwan at high risk for needlestick injuries. *Annals of epidemiology* **2002**; 12(3): 197-201.

- .76 Shiva F, Sanaei A, Shamshiri AR, Ghotbi F. Survey of needle-stick injuries in paediatric health personnel of 5 university hospitals in Tehran. *JPMA The Journal of the Pakistan Medical Association* **2011**; 61(2): 127-31.
- .77 Small L, Pretorius L, Walters A, Ackerman MJ. A surveillance of needle-stick injuries amongst student nurses at the University of Namibia. *Health SA Gesondheid* **2011**; 16.(1)
- .78 Smith DR, Smyth W, Leggat PA, Wang RS. Needlestick and sharps injuries among nurses in a tropical Australian hospital. *International journal of nursing practice* **2006**; 12.7-71 :(2)
- .79 Smith DR, Leggat PA. Needlestick and sharps injuries among nursing students. *Journal of advanced nursing* **2005**; 51(5): 449-55.
- .80 Suliman M, Al Qadire M, Alazzam M, Aloush S, Alsarairoh A, Alsarairoh FA. Students nurses' knowledge and prevalence of Needle Stick Injury in Jordan. *Nurse education today* **2018**; 60: 23-7.
- .81 Swe KMM, Zin T, Bhardwaj A, Abas ABL, Barua A. The prevalence of needle sticks injury among medical students in Melaka, Malaysia, a cross sectional study. *Eur J Sci Res* **2012** ; .20-214 :(2)71
- .82 Trinkoff AM, Le R, Geiger-Brown J, Lipscomb J. Work schedule, needle use, and needlestick injuries among registered nurses. *Infection control and hospital epidemiology* **2007**; 28(2): 156-64.
- .83 Wang S, Yao L, Li S, Liu Y, Wang H, Sun Y .Sharps injuries and job burnout: A cross-sectional study among nurses in China. *Nurs Health Sci* **2012**; 14(3): 332-8.
- .84 Wicker S, Jung J, Allwinn R, Gottschalk R, Rabenau HF. Prevalence and prevention of needlestick injuries among health care workers in a German university hospital. *Int Arch Occup Environ Health* **2008**; 81(3): 347-54.
- .85 Boal WL, Leiss JK, Sousa S, Lyden JT, Li J, Jagger J. The national study to prevent blood exposure in paramedics: exposure reporting. *American journal of industrial medicine* **2008**; 51(3): 213-22.
- .86 Xujun Z, Yue G, Mengjing C, Lorann S, Huiyun X. Needlestick and sharps injuries among nurses at a teaching hospital in China. *Work* **2015**; 63(5): 219-25.
- .87 Yao WX, Yang B, Yao C, et al. Needlestick injuries among nursing students in China. *Nurse Educ Today* **2010**; 30(5): 435-7.
